# Supplementary material for: Genetic removal of Nlrp3 protects against sporadic and R345W Efemp1-induced basal laminar deposit formation
Source: PubMed Central journal article supplement — bioRxiv. 2024 Oct 17:2024.10.14.618289. Preprint. [Version 1] doi: 10.1101/2024.10.14.618289 (PMC11507711; doi:10.1101/2024.10.14.618289), 2024-10-17

Sup. Figure 3

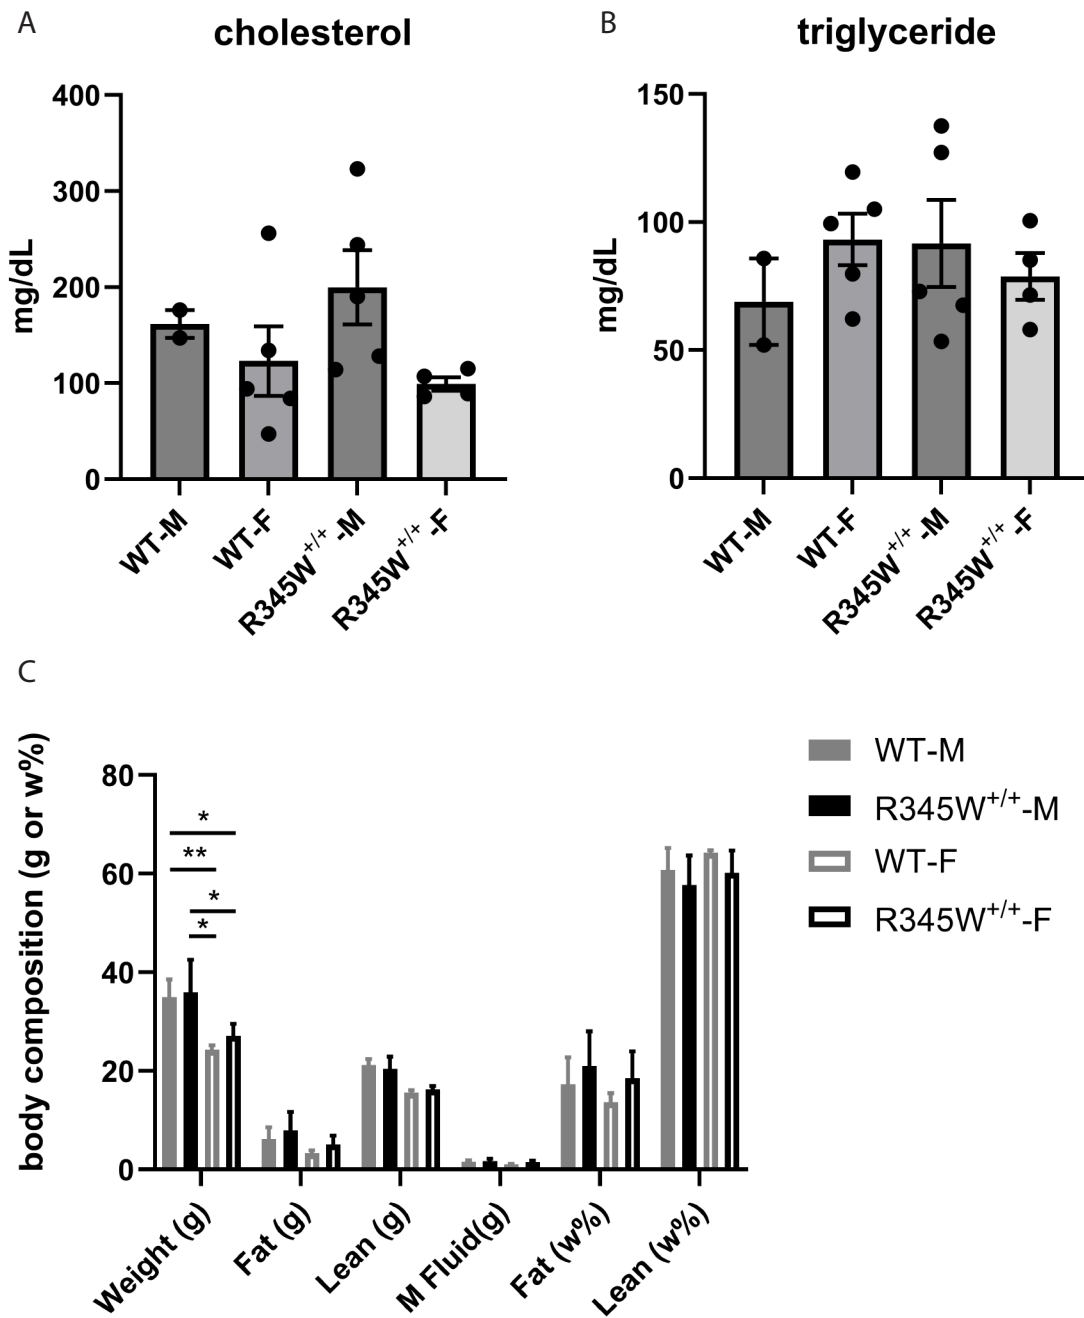

Supplement: media-3.pdf [file media-3.pdf]
